# Supplementary material for: ARAM: an automated image analysis software to determine rosetting parameters and parasitaemia in Plasmodium samples
Source: Springer Nature journal article supplement (doi:10.1186/s12936-016-1243-4), 2016-04-18

method difference  $\Delta C_o$

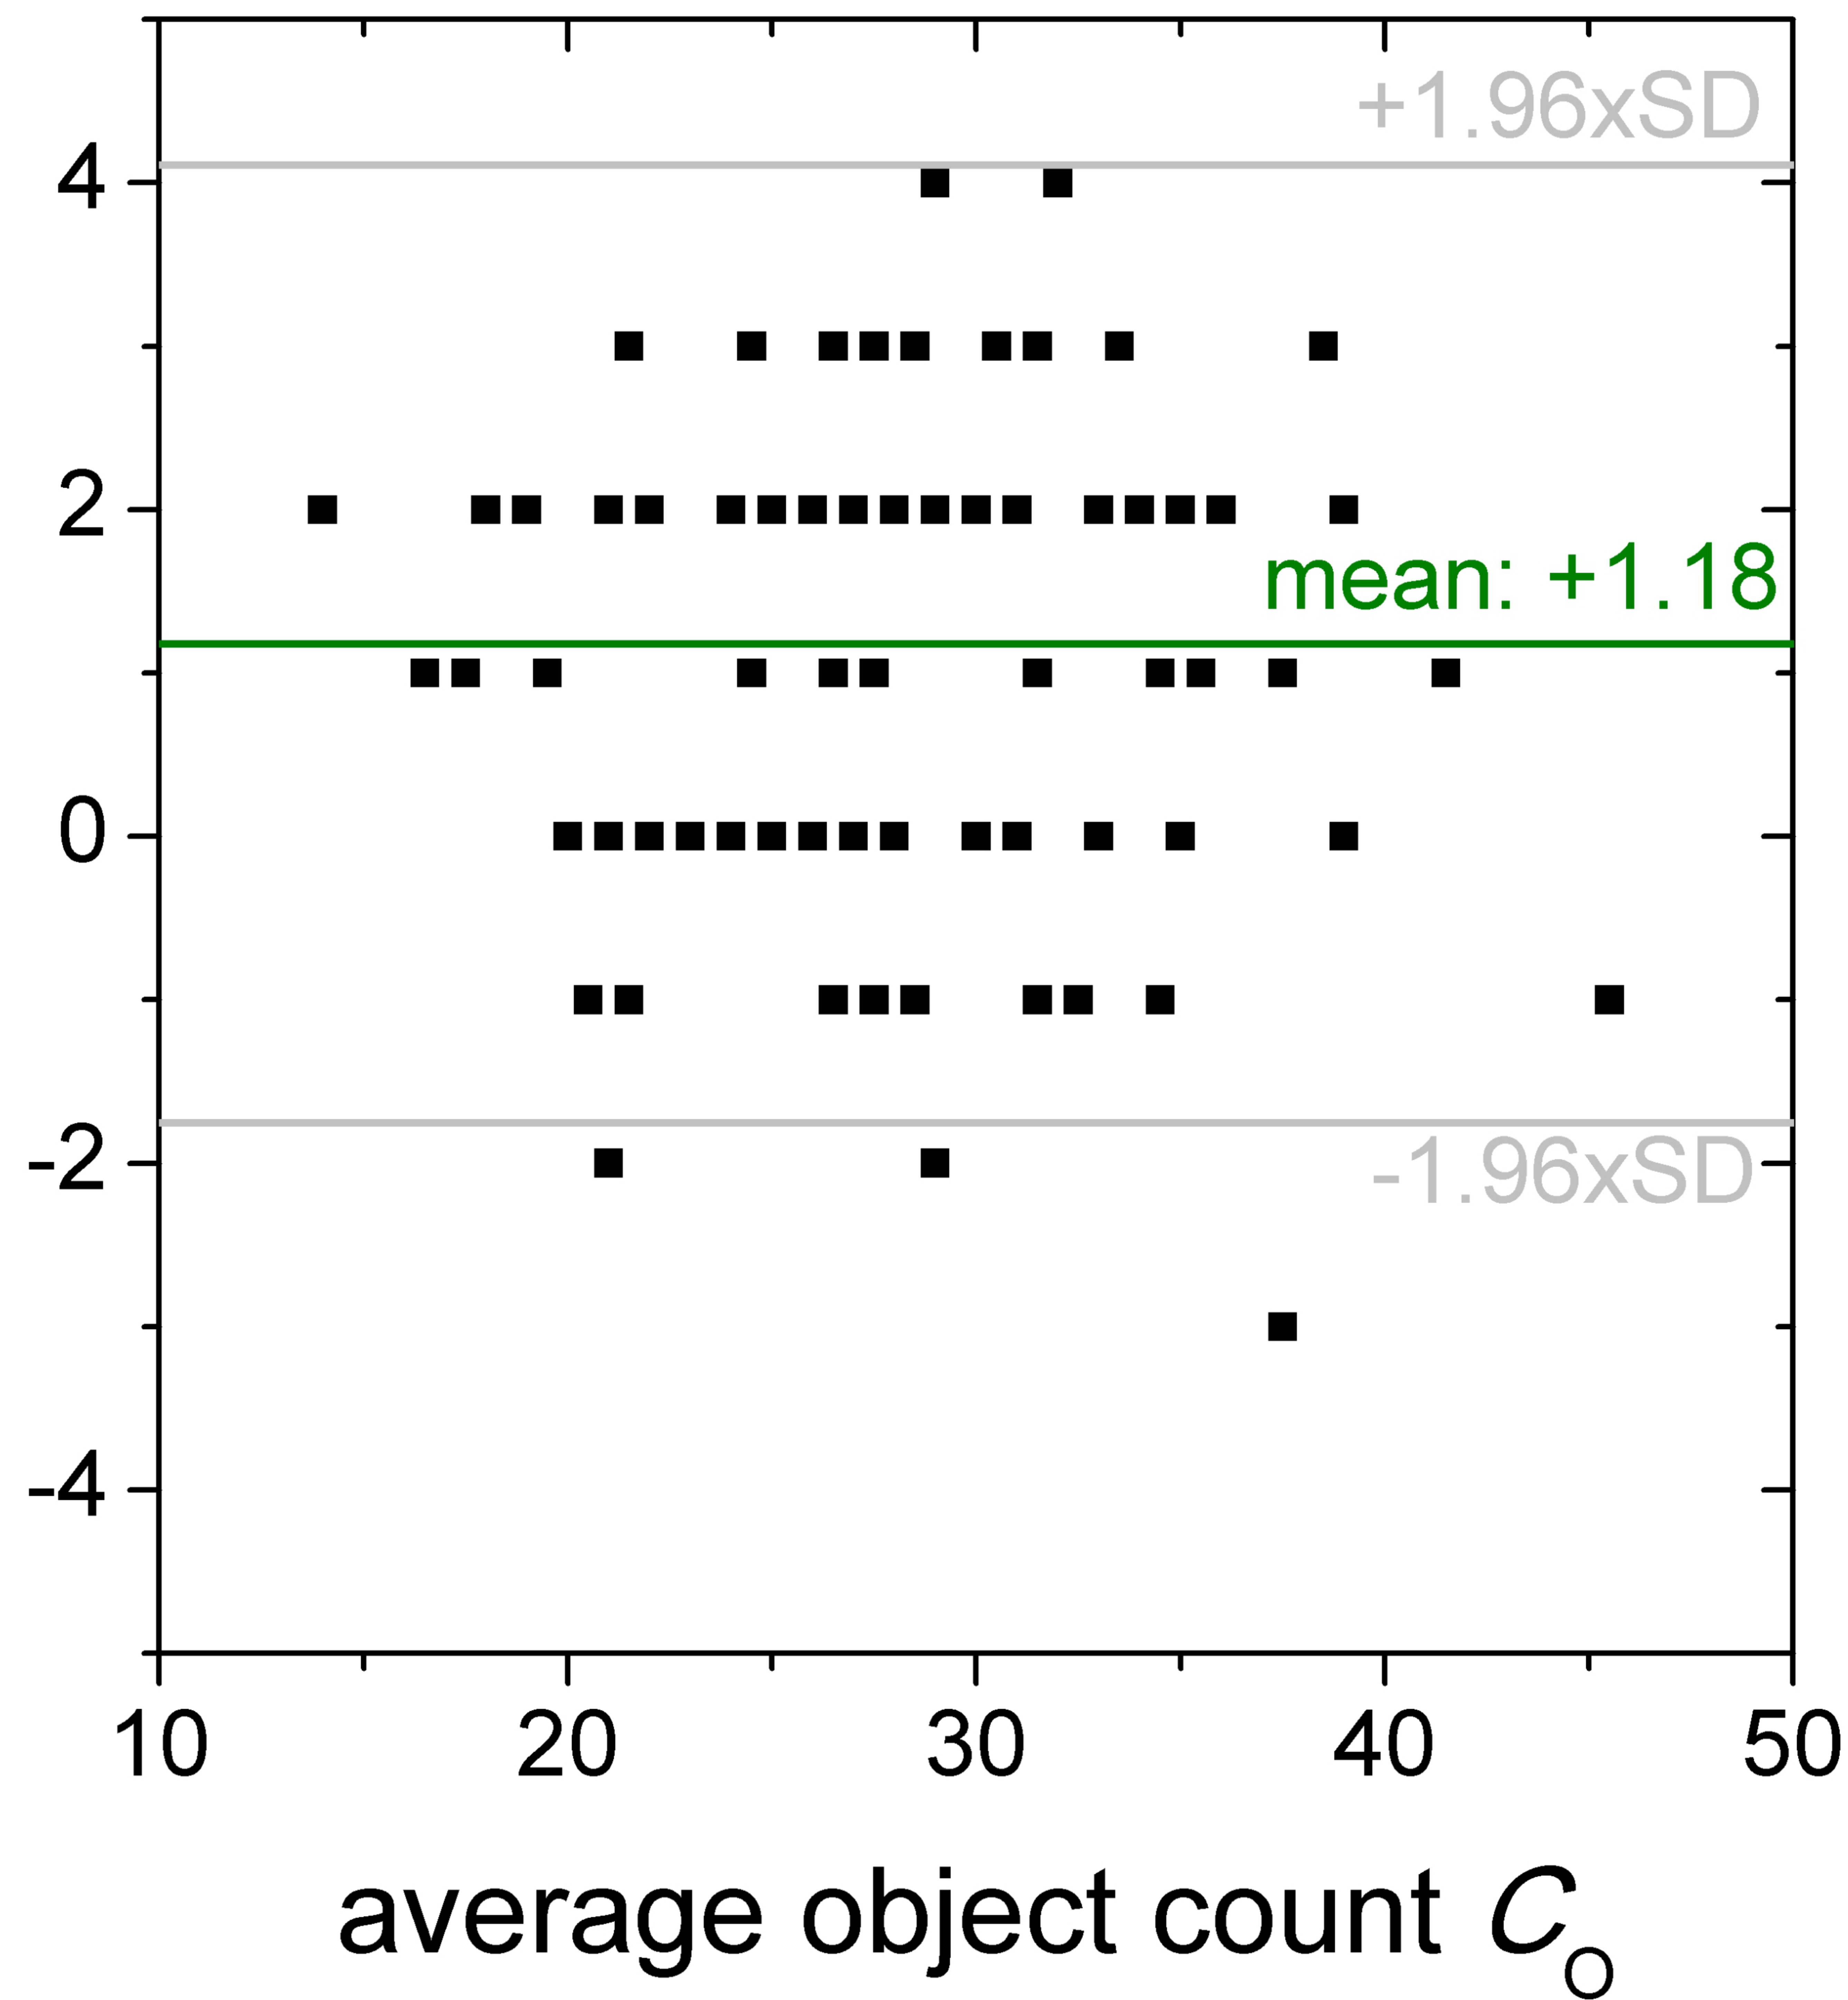

method difference  $\Delta C_R$

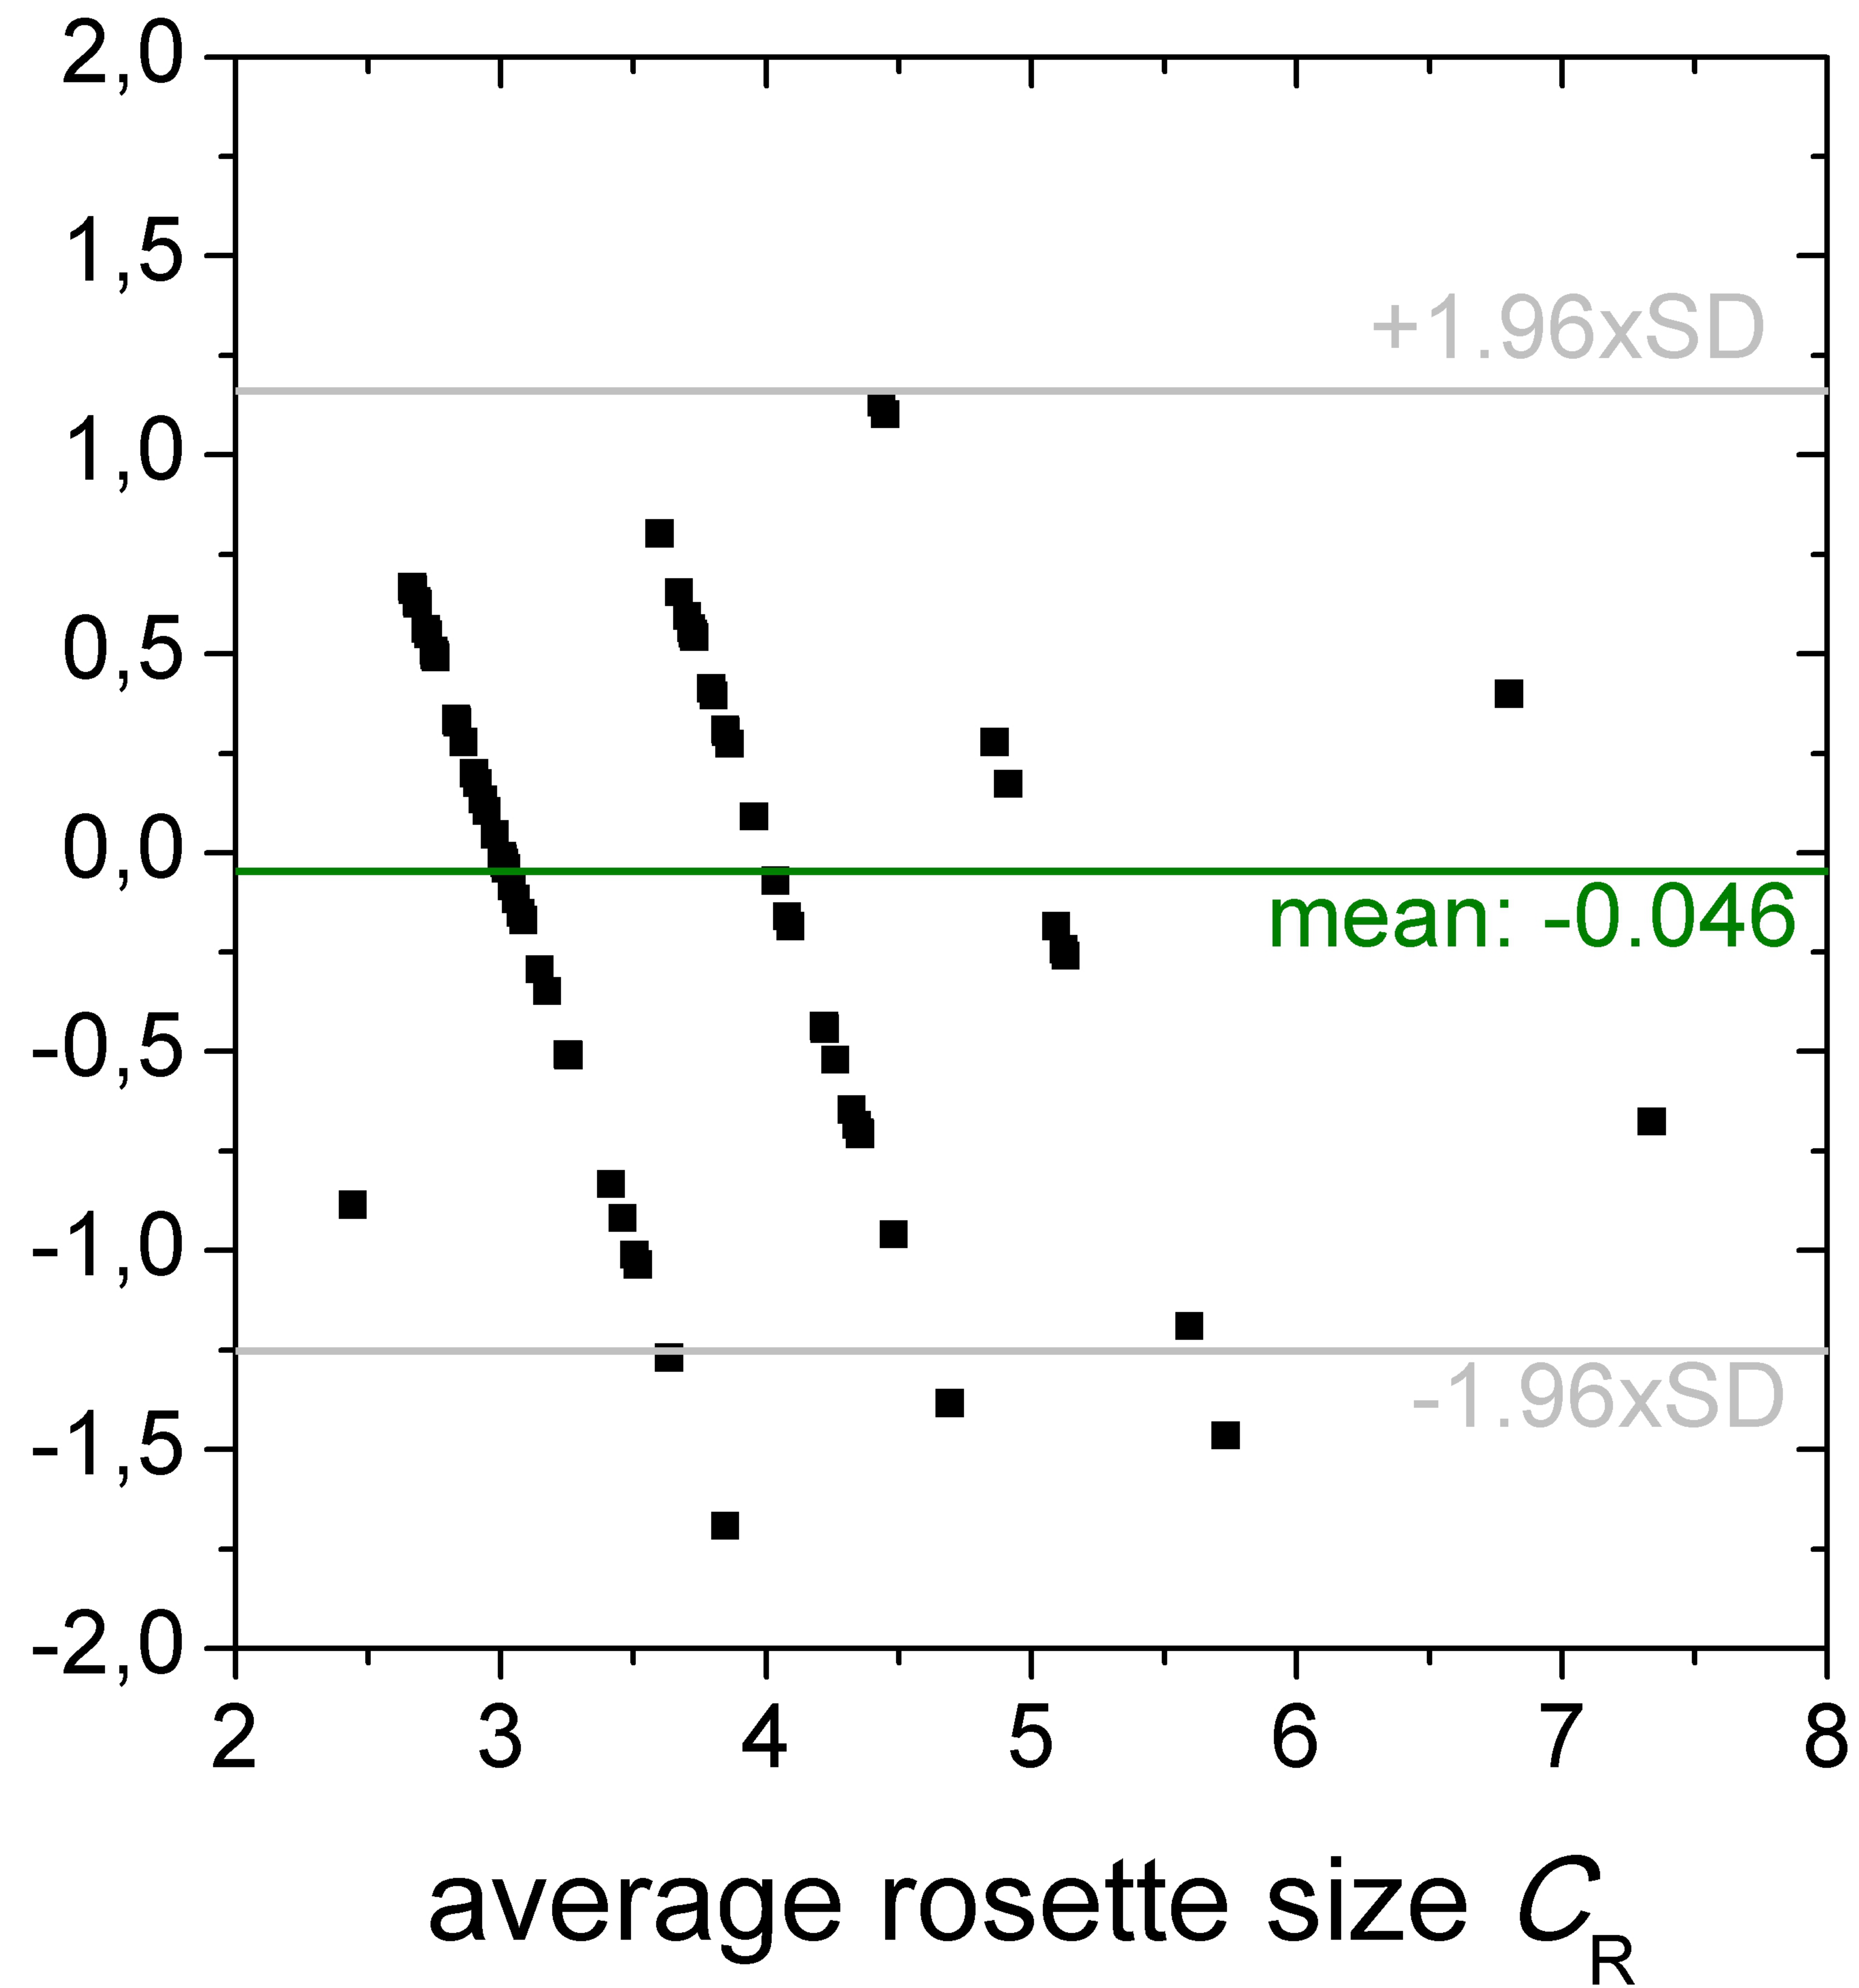

Supplement: MOESM3 [file 10030304]
